# Supplementary material for: Promotional effect of iron oxide on the catalytic properties of Fe–MnOx/TiO2 (anatase) catalysts for the SCR reaction at low temperatures
Source: Royal Society of Chemistry journal article supplement (doi:10.1039/c5cy01217a), 2015-10-15
Supplement: c5cy01217a1.pdf [file c5cy01217a1.pdf]

ESI for

## Promotional effect of iron oxide on the catalytic properties of Fe-MnO<sub>x</sub>/TiO<sub>2</sub> (Anatase) Catalysts for the SCR reaction at low temperatures

Shengcai Deng,<sup>a</sup> Ke Zhuang,<sup>a,b</sup> Bolian Xu,<sup>a</sup> Yuanhua Ding,<sup>c</sup> Lei Yu,<sup>\*a,c</sup> and Yining Fan<sup>\*a</sup>

<sup>a</sup> Key Laboratory of Mesoscopic Chemistry of MOE, Jiangsu Key Laboratory of Vehicle Emissions Control, Jiangsu Provincial Key Laboratory of Nanotechnology, School of Chemistry and Chemical Engineering, Nanjing University, Nanjing 210093, China.

Email: [ynfan@nju.edu.cn](mailto:ynfan@nju.edu.cn); Fax: +86-25-83317761; Tel: +86-25-83594620

<sup>b</sup> Environmental Engineering Research Sub-institute, State Power Science and Technology Research Institute, Nanjing 210031, China

<sup>c</sup> Jiangsu Key Laboratory of Environmental Material and Environmental Engineering, School of Chemistry and Chemical Engineering, Yangzhou University, Yangzhou, 225002, China. Email: [yulei@yzu.edu.cn](mailto:yulei@yzu.edu.cn); Fax: +86-514-87975244; Tel: +86-136-65295901

### CONTENTS

|                                                                                                                                      |       |
|--------------------------------------------------------------------------------------------------------------------------------------|-------|
| 1. Original TEM image and element mapping of MnO <sub>x</sub> /TiO <sub>2</sub> and Fe(1.0)-MnO <sub>x</sub> /TiO <sub>2</sub> ..... | S1&S2 |
| 2. SEM image of the catalysts.....                                                                                                   | S3    |
| 3. XPS analysis of the catalysts.....                                                                                                | S4    |
| 4. DRIFT of the catalysts.....                                                                                                       | S5    |

# 1. Original TEM image and element mapping of $\text{MnO}_x/\text{TiO}_2$ and $\text{Fe(1.0)-MnO}_x/\text{TiO}_2$

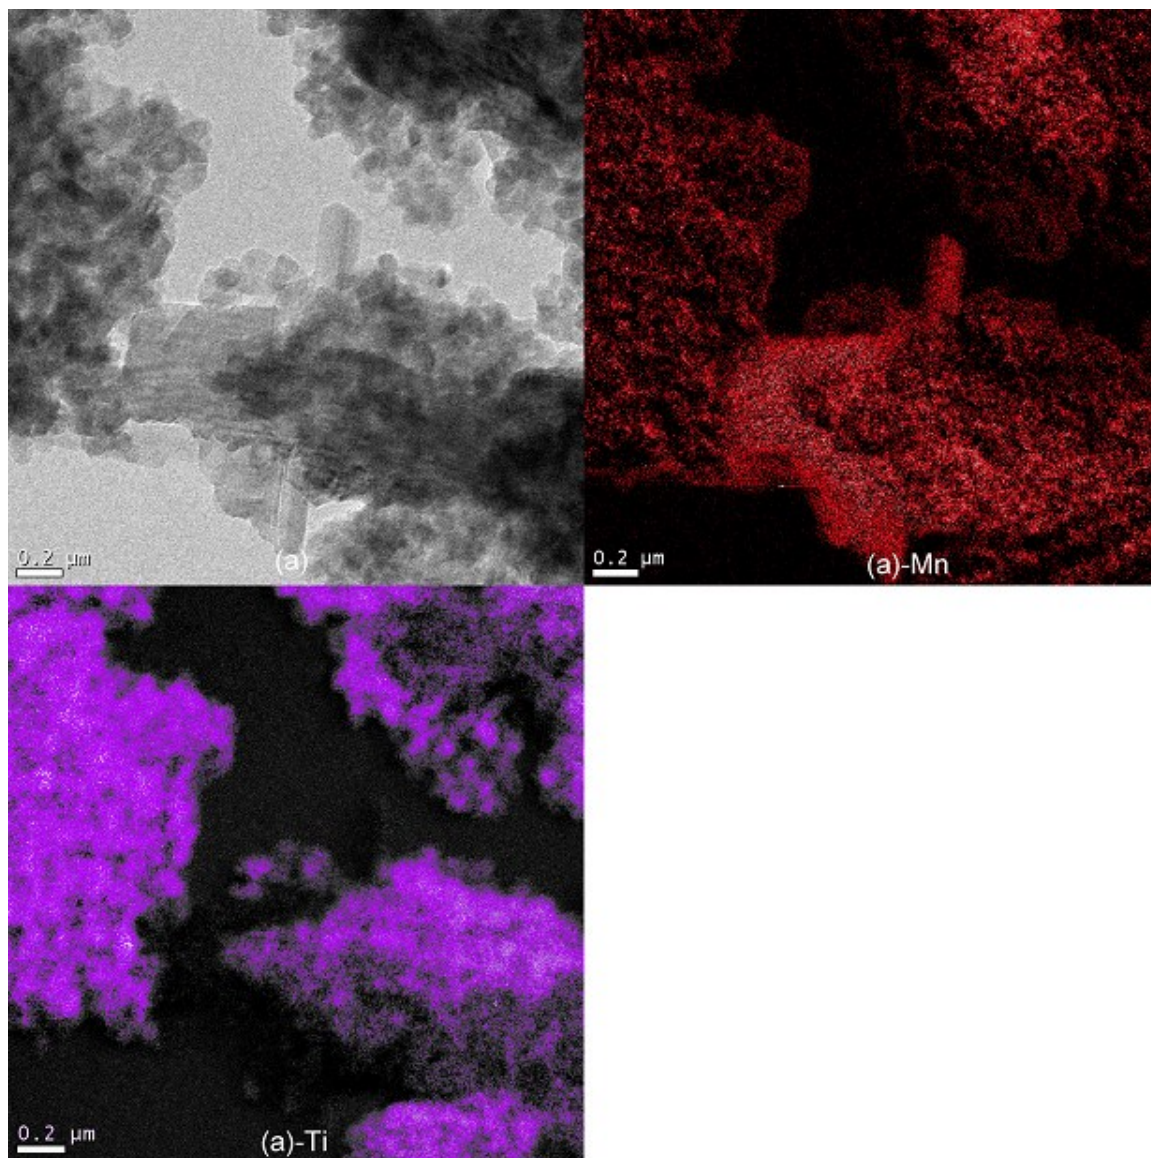

**Figure S1.** Original TEM image and element mapping of  $\text{MnO}_x/\text{TiO}_2$

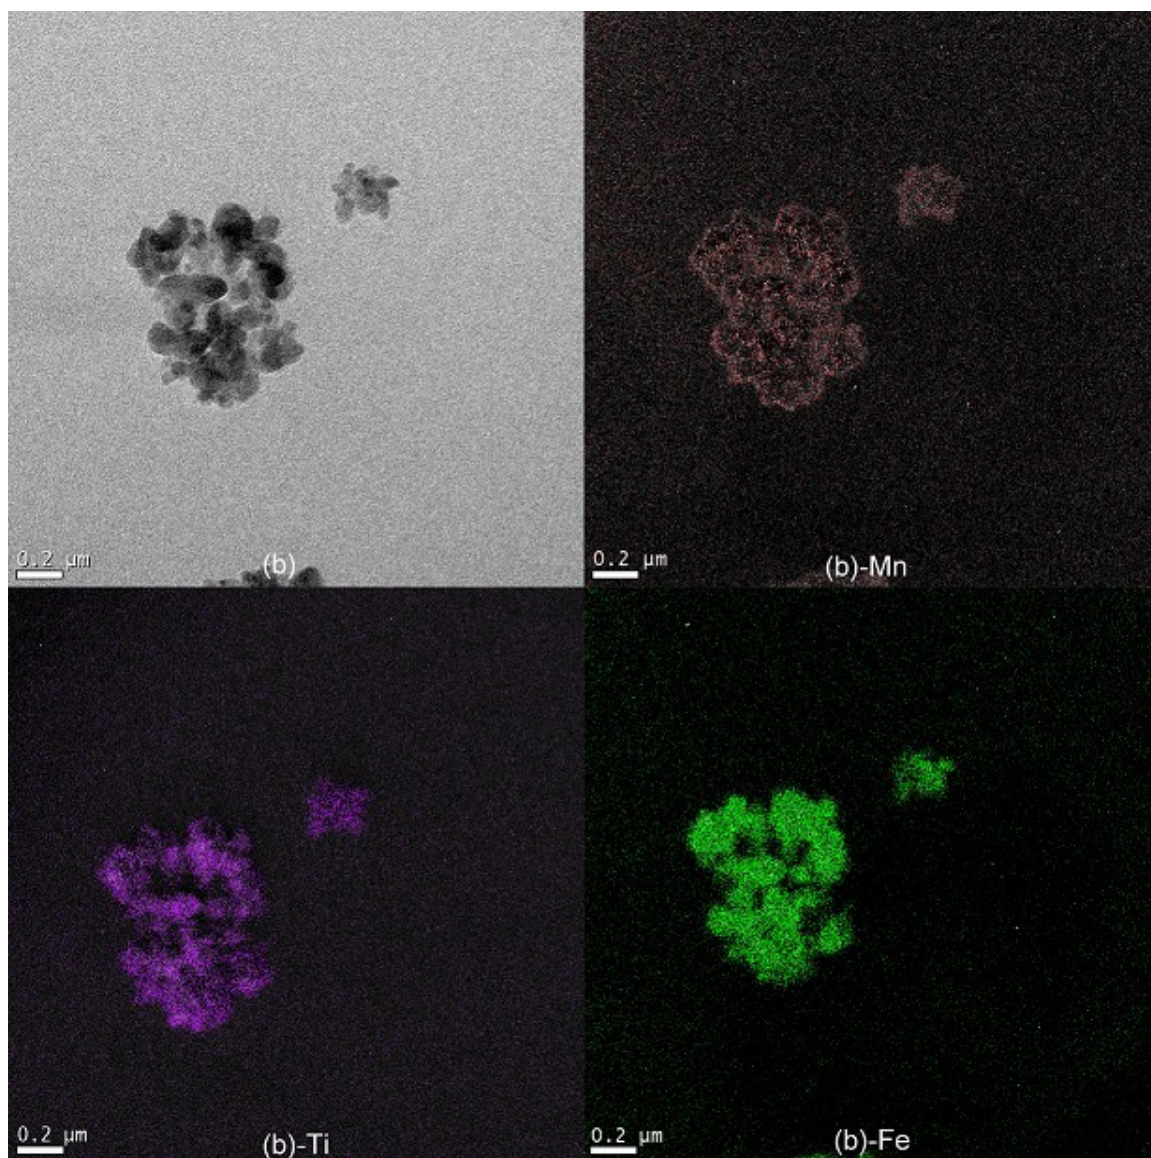

**Figure S2.** Original TEM image and element mapping of Fe(1.0)-MnO<sub>x</sub>/TiO<sub>2</sub>

## 2. SEM images of $\text{MnO}_x/\text{TiO}_2$ and $\text{Fe}(1.0)\text{-MnO}_x/\text{TiO}_2$

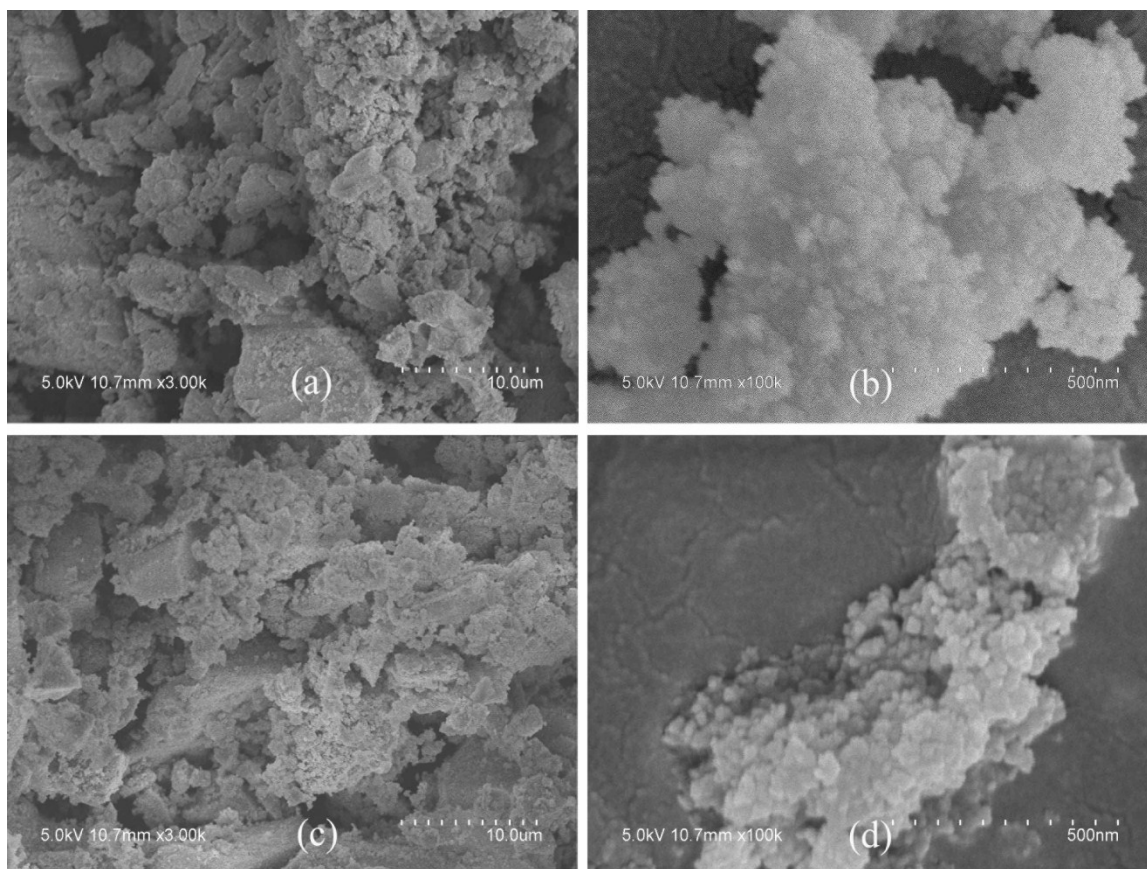

**Figure S3.** SEM images (a), (b) for  $\text{MnO}_x/\text{TiO}_2$  catalyst and (c), (d) for  $\text{Fe}(1.0)\text{-MnO}_x/\text{TiO}_2$  catalyst

### 3. Investigations of element valences on catalyst surfaces by XPS spectra

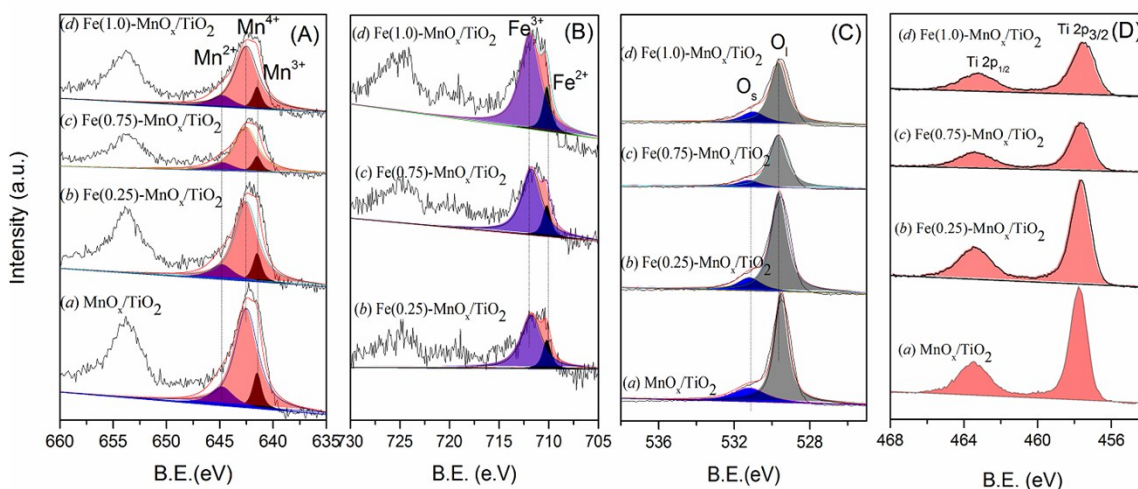

**Figure S4.** XPS spectra of (A) Mn 2p, (B) Fe 2p, (C) Ti 3d, (D) O 1s of Fe-MnO<sub>x</sub>/TiO<sub>2</sub> catalysts with different Fe/Mn molar ratios

**Table S1.** The surface elements BE (eV) composition determined by XPS (C 1s =284.6 eV)

| XPS spectra | Element species  | Binding Energy (percentage of valence species%) |                                             |                                             |                                            |
|-------------|------------------|-------------------------------------------------|---------------------------------------------|---------------------------------------------|--------------------------------------------|
|             |                  | MnO <sub>x</sub> /TiO <sub>2</sub>              | Fe(0.25)-MnO <sub>x</sub> /TiO <sub>2</sub> | Fe(0.75)-MnO <sub>x</sub> /TiO <sub>2</sub> | Fe(1.0)-MnO <sub>x</sub> /TiO <sub>2</sub> |
| Mn 2p       | Mn <sup>2+</sup> | 644.8(14)                                       | 644.8(14)                                   | 644.8(14)                                   | 644.8(14)                                  |
|             | Mn <sup>4+</sup> | 642.5(77)                                       | 642.5(75)                                   | 642.5(75)                                   | 642.5(75)                                  |
|             | Mn <sup>3+</sup> | 641.5(9)                                        | 641.5(11)                                   | 641.5(11)                                   | 641.5(11)                                  |
| Fe 2p       | Fe <sup>3+</sup> | -                                               | 711.7(81)                                   | 711.7(83)                                   | 711.7(83)                                  |
|             | Fe <sup>2+</sup> | -                                               | 710.2(19)                                   | 710.2(17)                                   | 710.2(17)                                  |
| O 1s        | O <sup>2-</sup>  | 529.0(24)                                       | 529.1(16)                                   | 529.1(16)                                   | 529.1(22)                                  |
|             | OH <sup>-</sup>  | 531.4(76)                                       | 531.4(84)                                   | 531.4(84)                                   | 530.7(78)                                  |

## 4. DRIFT experiments of catalysts

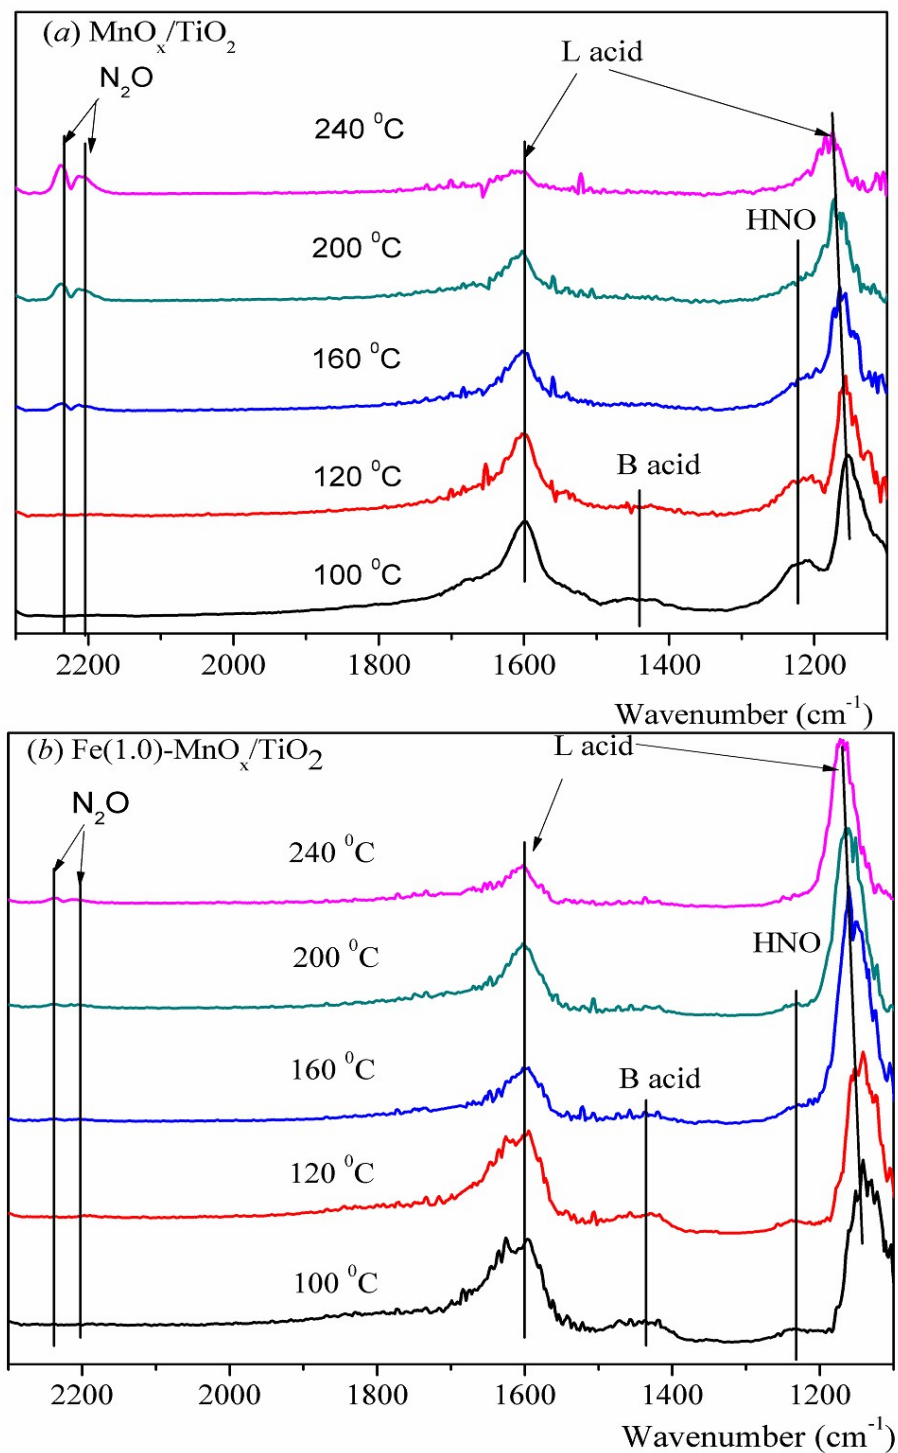

Figure S5. DRIFT spectra of the catalysts.
